# Supplementary material for: Photocatalytic C–N coupling towards urea synthesis with a palladium-supported CeO2 catalyst
Source: Royal Society of Chemistry journal article supplement (doi:10.1039/d2cy02086f), 2023-01-01
Supplement: d2cy02086f1.pdf [file d2cy02086f1.pdf]

## Supplementary Information

### Photocatalytic C-N coupling toward urea synthesis with Palladium-Supported CeO<sub>2</sub> Catalyst

Shuyi Yang<sup>a</sup>, Jiayi Deng<sup>a</sup>, Jiaying Chen<sup>a</sup>, Qingmei Tan<sup>a</sup>, Tianren Liu<sup>a</sup>, Ke Chen<sup>a</sup>,  
Dongxue Han<sup>\*ab</sup>, Yingming Ma<sup>\*a</sup>, Mengjiao Dai<sup>c</sup>, Li Niu<sup>a</sup>

<sup>a</sup> Guangzhou Key Laboratory of Sensing Materials & Devices, Center for Advanced Analytical Science, School of Chemistry and Chemical Engineering, Guangzhou University, Guangzhou 510006, P. R. China.

<sup>b</sup> Guangdong Provincial Key Laboratory of Psychoactive Substances Monitoring and Safety, Anti-Drug Technology Center of Guangdong Province, Guangzhou 510230, P. R. China.

<sup>c</sup> State Key Laboratory of Electroanalytical Chemistry, c/o Engineering Laboratory for Modern Analytical Techniques, Changchun Institute of Applied Chemistry, Chinese Academy of Sciences, Changchun 130022, P. R. China; University of Chinese Academy of Sciences, Beijing 100049, P. R. China.

\* E-mail address of the corresponding author: [dxhan@gzhu.edu.cn](mailto:dxhan@gzhu.edu.cn),  
[ccymma@gzhu.edu.cn](mailto:ccymma@gzhu.edu.cn)

---

## Table of contents

Supplementary Figures 1-20

Supplementary Tables 1-5

Supplementary References [1]-[4]

## Experimental Procedures

### Synthesis of CeO<sub>2</sub>

CeO<sub>2</sub> nanorods were synthesized via a hydrothermal method<sup>1</sup>. Typically, 0.6513g of Ce(NO<sub>3</sub>)<sub>3</sub>·6H<sub>2</sub>O was dissolved in 30 mL of NaOH aqueous solution (6 mol/L) under stirring at room temperature. The mixed solution was magnetically stirred for 1 h at room temperature and then transferred into a 100 mL of Teflon-lined stainless steel autoclave. Subsequently, the autoclave was hydrothermally treated at 100 °C for 24 h and cooled down to room temperature naturally. The resulting precipitation was collected and washed with DI water and ethanol for several times. Then dried in vacuum at 70 °C overnight and the obtained yellow powder was calcined in air at 400 °C for 4 h with a ramping rate of 5 °C/min.

### Synthesis of Pd-CeO<sub>2</sub> catalysts

Pd-CeO<sub>2</sub> catalysts were synthesized by the deposition-precipitation method<sup>2</sup>. Ceria nanorods (0.3 g) were dispersed in 80 mL of deionized water and the calculated amount of palladium chloride was dissolved in 20 mL deionized water. Afterwards, a certain amount of PdCl<sub>2</sub> aqueous solution was added into the suspension at 50 °C under stirring. After stirring for 15 min, the pH value of the mixed solution was adjusted to 10 by the addition of 1 mol/L of Na<sub>2</sub>CO<sub>3</sub> aqueous solution. The mixture was stirred at 50 °C for additional 3 h and the resulting solid was collected by centrifugation and washing with deionized water for several times and then dried in vacuum at 80 °C for 16 h. The acquired solid was heat treated at 200 °C for 2 hours in 10% Ar/H<sub>2</sub> (heating rate: 5 °C/min). The as-prepared Pd-CeO<sub>2</sub> catalysts were labeled as x% Pd-CeO<sub>2</sub> (x =

---

2, 7, 12, and 16), in which the “x” represents the nominal Pd loading.

7% Ag-CeO<sub>2</sub>, 7% Au-CeO<sub>2</sub> and 7% Pt-CeO<sub>2</sub> nanorods were prepared following the same procedures except the calculated amount of palladium chloride was replaced by 0.03307 g of silver nitrate or 0.04199 g of chlorauric acid trihydrate or 0.05576 g of chloroplatinic acid hexahydrate in the beginning. The actual metal contents in these samples were measured by the inductively coupled plasma-optical emission spectroscopy (ICP-OES).

## Determination of Hydrazine

The concentration of hydrazine was detected by the method of Watt and Chrisp<sup>3</sup>. 5.99 g of p-C<sub>9</sub>H<sub>11</sub>NO and 30 mL of hydrochloric acid (HCl) were added to 300 mL of ethanol as the colouring reagent solution of hydrazine. 2 mL of colouring reagent was added to 2 mL of sample solution and then the solution was incubated at dark for 30 min under room temperature. Then the absorbance at 458 nm was obtained by spectrophotometry. The N<sub>2</sub>H<sub>4</sub> concentration of the fitting curve and the calibration curve ( $y = 0.33694x + 0.01323$ ,  $R^2 = 0.99989$ ) has a good linear relationship. As shown in the Fig. S11.

## Determination of Ammonia

The concentration of ammonia is mainly determined by indophenol blue method<sup>4</sup>. Typically, 0.5 mL of phenol nitroprusside solution and 0.5 mL of alkaline hypochlorite solution are added to 2.0 mL of sample solution containing ammonia. The mixed solution was incubated for 30 min under room temperature and the absorbance at the wavelength  $\lambda = 630$  nm was obtained by UV-vis spectrophotometry. The calibration curve shows a good linear relation of absorbance with ammonia concentration ( $y = 0.01334x + 0.05171$ ,  $R^2 = 0.99917$ ). As shown in the Fig. S13.

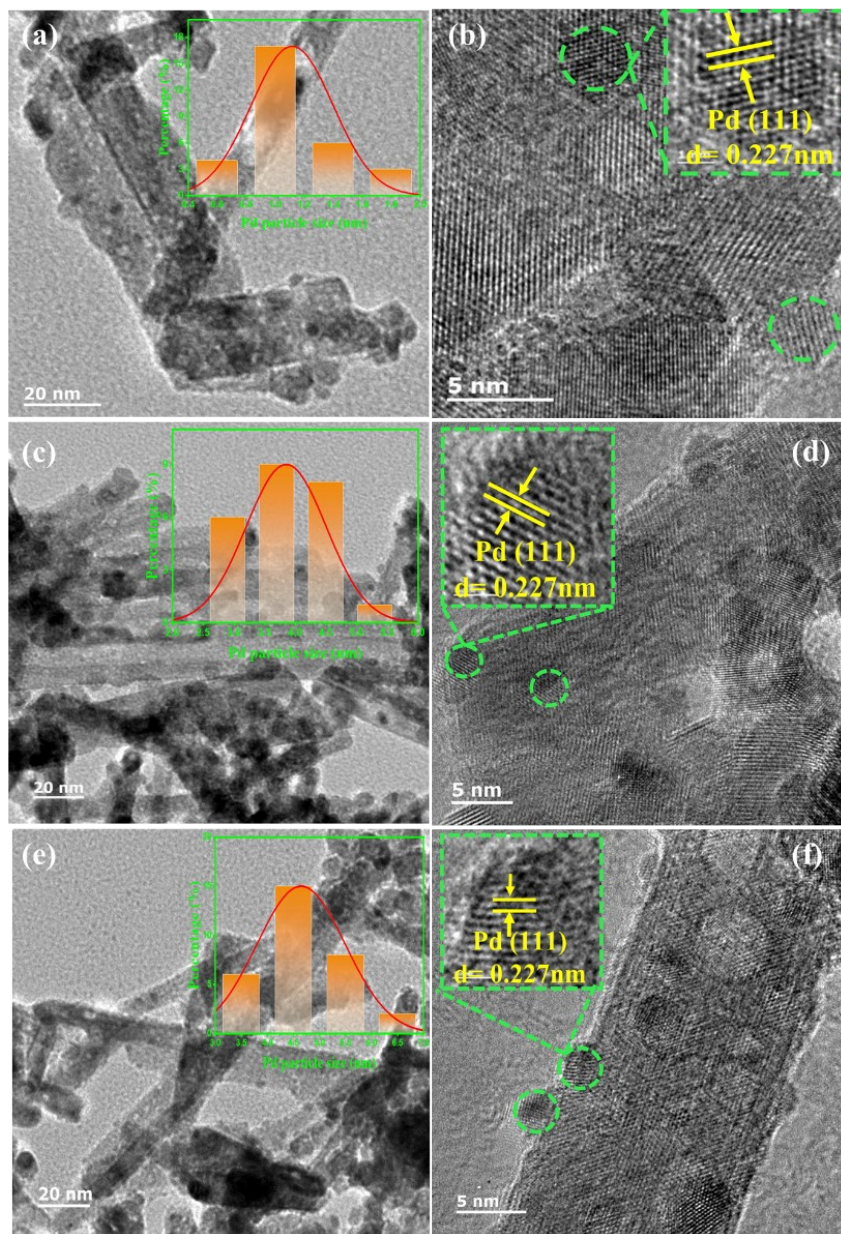

Fig. S1 TEM and HRTEM images of the samples. (a-b) 2% Pd-CeO<sub>2</sub>, (c-d) 12% Pd-CeO<sub>2</sub> and (e-f) 16% Pd-CeO<sub>2</sub>.

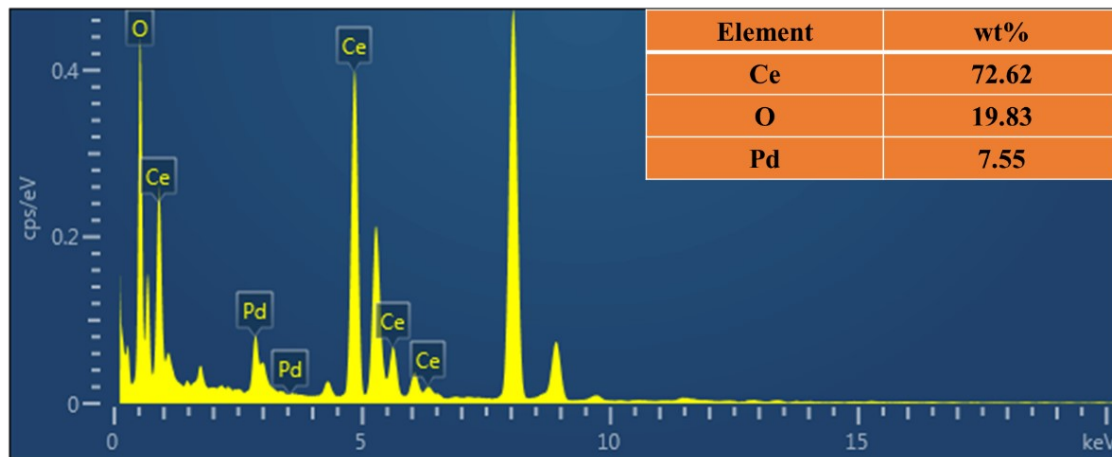

Fig. S2 The energy dispersive X-ray (EDX) spectroscopy of 7% Pd-CeO<sub>2</sub>.

The energy dispersive X-ray (EDX) spectroscopy was used to explore the loading amount of Pd. As shown in Fig. S2, the weight ratio of Pd for 7% Pd-CeO<sub>2</sub> catalyst is 7.55%, which confirmed that palladium has been successfully loaded on the surface of the catalyst. Meanwhile, the weight ratio of Ce and O elements for 7% Pd-CeO<sub>2</sub> catalyst is 72.62% and 19.83%, respectively.

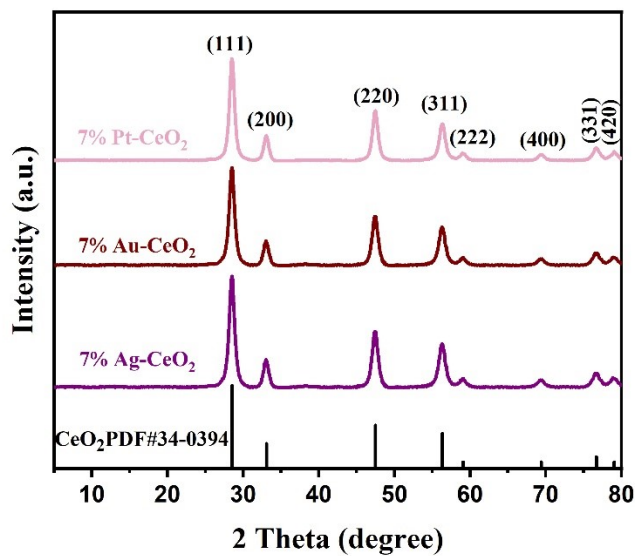

Fig. S3 XRD patterns of 7% Ag-CeO<sub>2</sub>, 7% Au-CeO<sub>2</sub> and 7% Pt-CeO<sub>2</sub>.

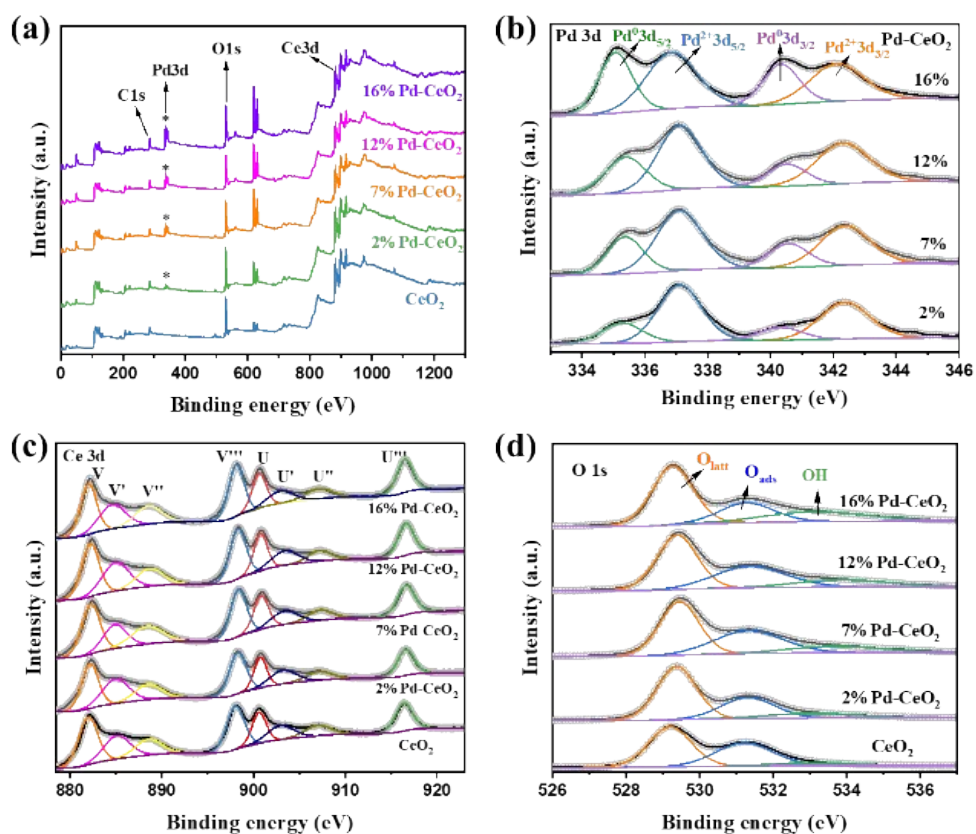

Fig. S4 XPS spectra of the (a) full spectrum, (b) Pd 3d, (c) Ce 3d and (d) O 1s peaks for CeO<sub>2</sub>, 2% Pd-CeO<sub>2</sub>, 7% Pd-CeO<sub>2</sub>, 12% Pd-CeO<sub>2</sub> and 16% Pd-CeO<sub>2</sub>.

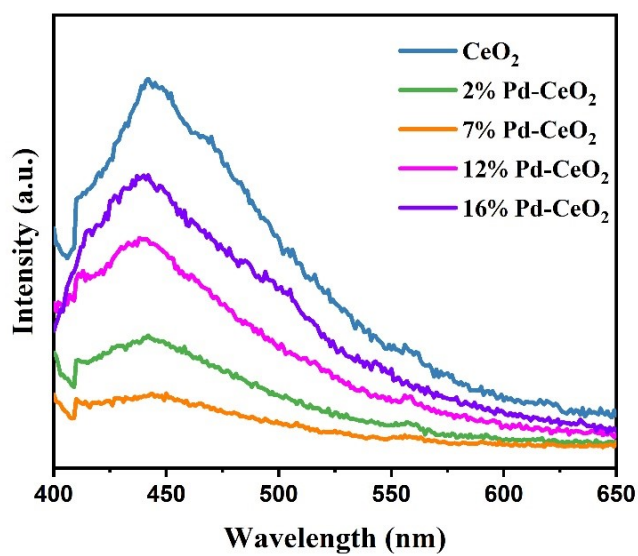

Fig. S5 PL spectra of CeO<sub>2</sub>, 2% Pd-CeO<sub>2</sub>, 7% Pd-CeO<sub>2</sub>, 12% Pd-CeO<sub>2</sub> and 16% Pd-CeO<sub>2</sub>.

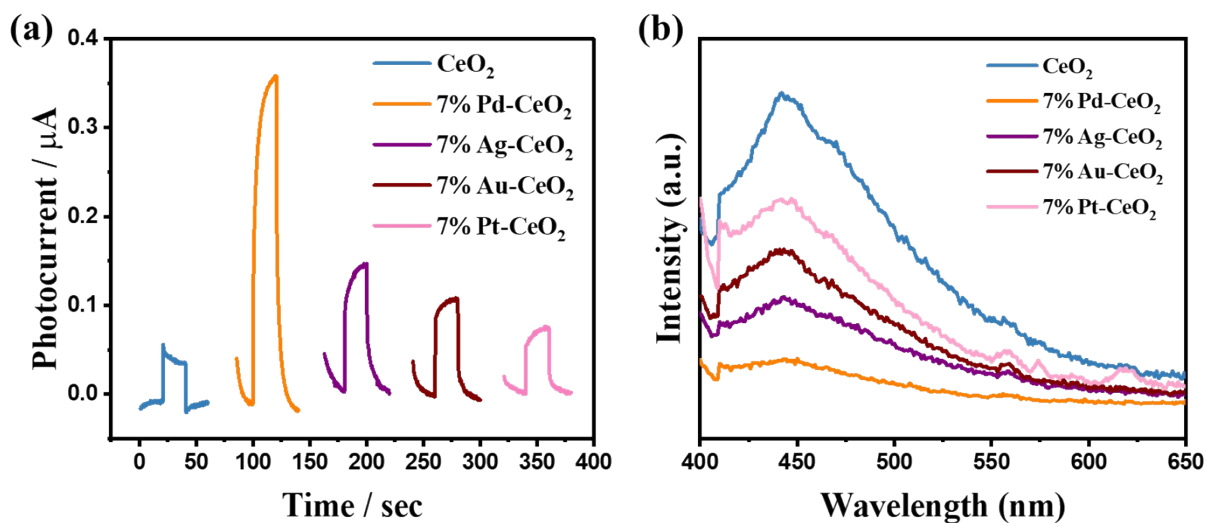

Fig. S6 The electrochemical tests of  $\text{CeO}_2$ , 7% Pd- $\text{CeO}_2$ , 7% Ag- $\text{CeO}_2$ , 7% Au- $\text{CeO}_2$  and 7% Pt- $\text{CeO}_2$ . (a) Transient photocurrents, (b) PL spectra.

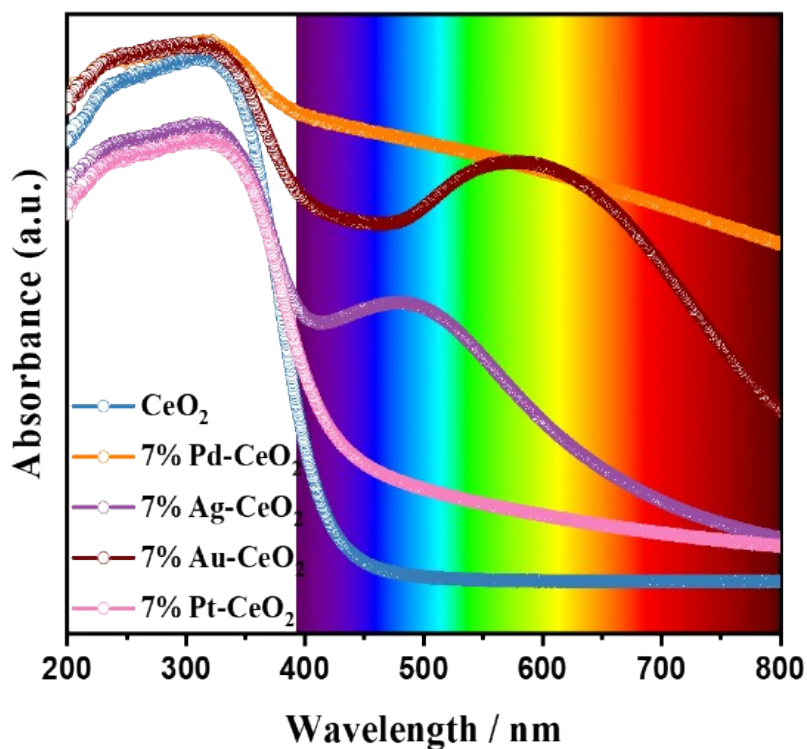

Fig. S7 UV-vis diffuse reflectance spectra of  $\text{CeO}_2$ , 7% Pd- $\text{CeO}_2$ , 7% Ag- $\text{CeO}_2$ , 7% Au- $\text{CeO}_2$  and 7% Pt- $\text{CeO}_2$ .

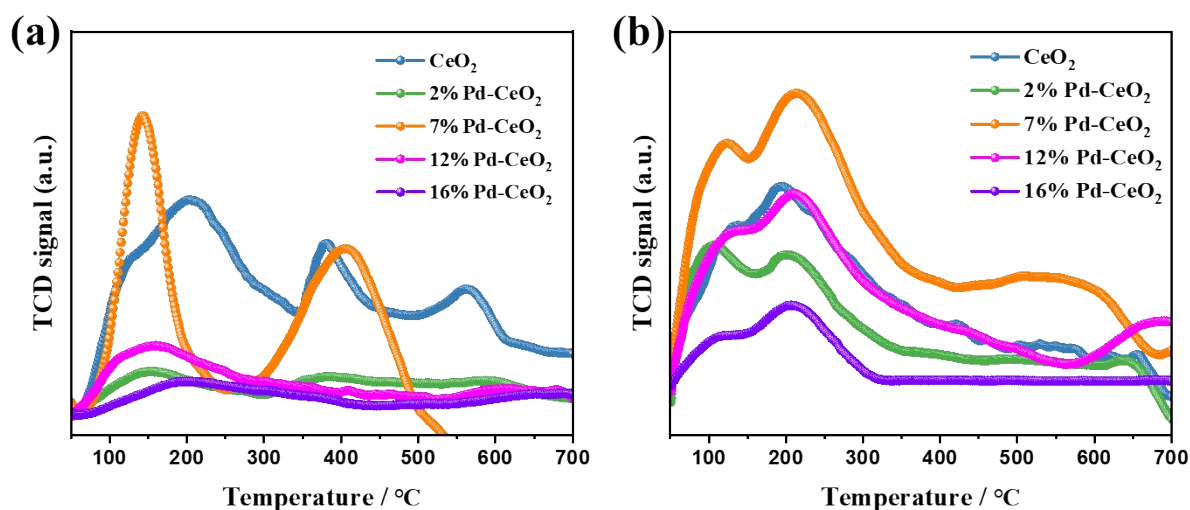

Fig. S8 (a)  $N_2$ -TPD spectra and (b)  $CO_2$ -TPD spectra of  $CeO_2$ , 2% Pd- $CeO_2$ , 7% Pd- $CeO_2$ , 12% Pd- $CeO_2$  and 16% Pd- $CeO_2$ .

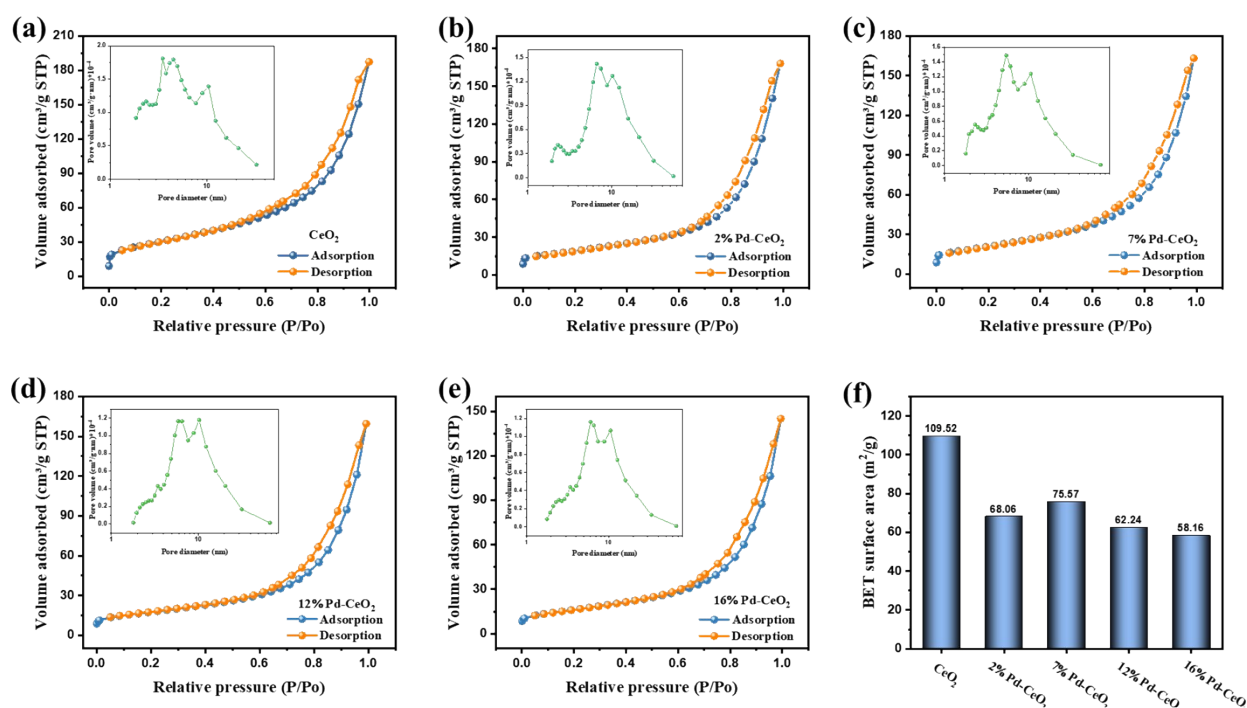

Fig. S9 The  $N_2$  adsorption-desorption isotherms and the corresponding pore size distribution curves (inserts) of (a)  $CeO_2$ , (b) 2% Pd- $CeO_2$ , (c) 7% Pd- $CeO_2$ , (d) 12% Pd- $CeO_2$  and (e) 16% Pd- $CeO_2$ . (f) The specific surface areas of  $CeO_2$ , 2% Pd- $CeO_2$ , 7% Pd- $CeO_2$ , 12% Pd- $CeO_2$  and 16% Pd- $CeO_2$ .



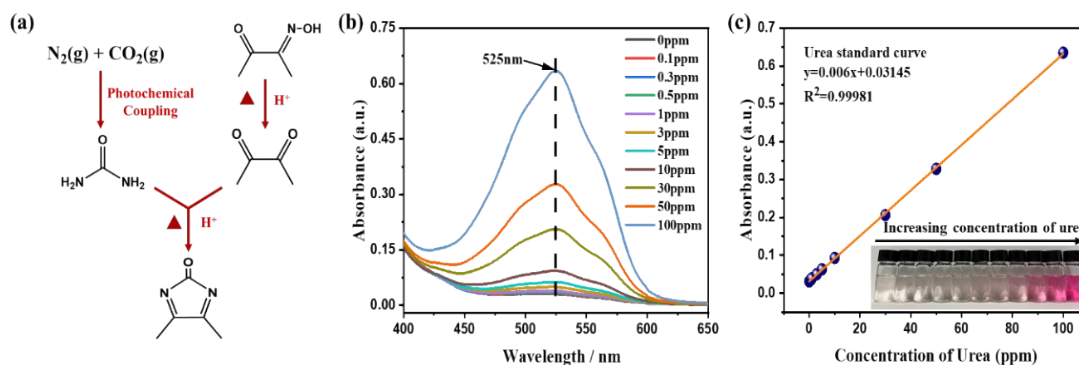

Fig. S10 (a) Reaction mechanism on the diacetyl monoxime method to detect urea. (b) A series of standard solutions with urea concentrations and the absorbance was measured by UV-vis spectrophotometer in the range of 200 to 800 nm. (c) A series of standard solutions with urea concentrations of 0 ppm, 0.1 ppm, 0.3 ppm, 0.5 ppm, 1.0 ppm, 3.0 ppm, 5.0 ppm, 10 ppm, 30 ppm, 50 ppm and 100 ppm respectively and the absorbance at 525 nm was measured by UV-vis spectrophotometer. The calibration curve indicated good linear relation of absorbance with urea concentration ( $y = 0.006x + 0.03145$ ,  $R^2 = 0.99981$ ), the inset are the pictures of pink solutions with different urea concentrations.

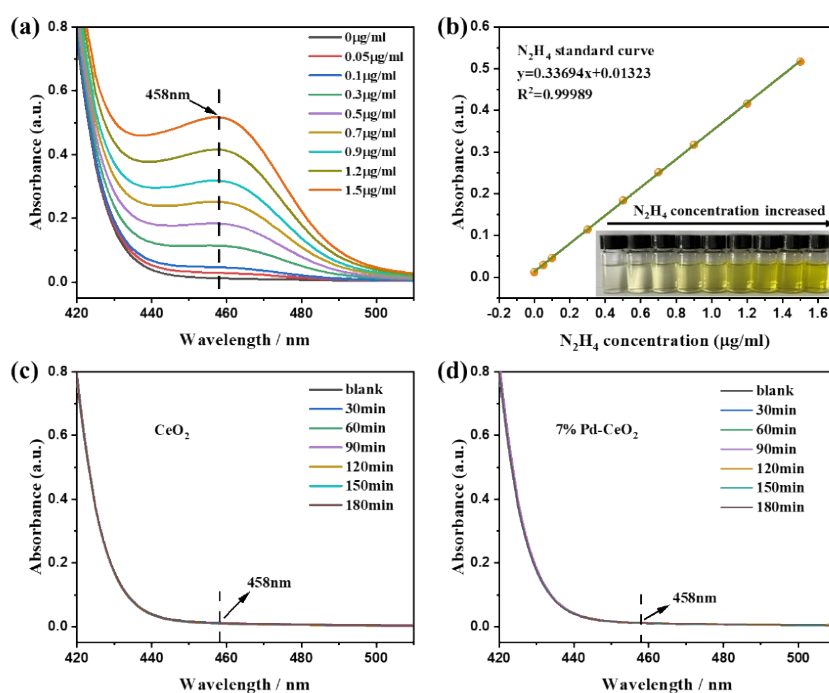

Fig. S11 Calibration curve for quantification of  $\text{N}_2\text{H}_4$  by the method of Watt and Chrisp.

(a) A series of standard solutions were prepared with the concentrations of 0, 0.05, 0.1, 0.3, 0.5, 0.7, 0.9, 1.2 and 1.5  $\mu\text{g ml}^{-1}$  respectively and absorbance at 458 nm were obtained after addition of color reagent for 20 min. (b) The fitting curve shown good linear relation of absorbance with  $\text{N}_2\text{H}_4$  concentration ( $y = 0.33694x + 0.01323$ ,  $R^2 = 0.99989$ ) of independent calibration curves and the inset were the pictures of yellow solutions with different  $\text{N}_2\text{H}_4$  concentrations. (c-d) The absorbance of  $\text{CeO}_2$  and 7% Pd- $\text{CeO}_2$  at 458 nm in different time periods was measured by UV-vis spectrophotometer.

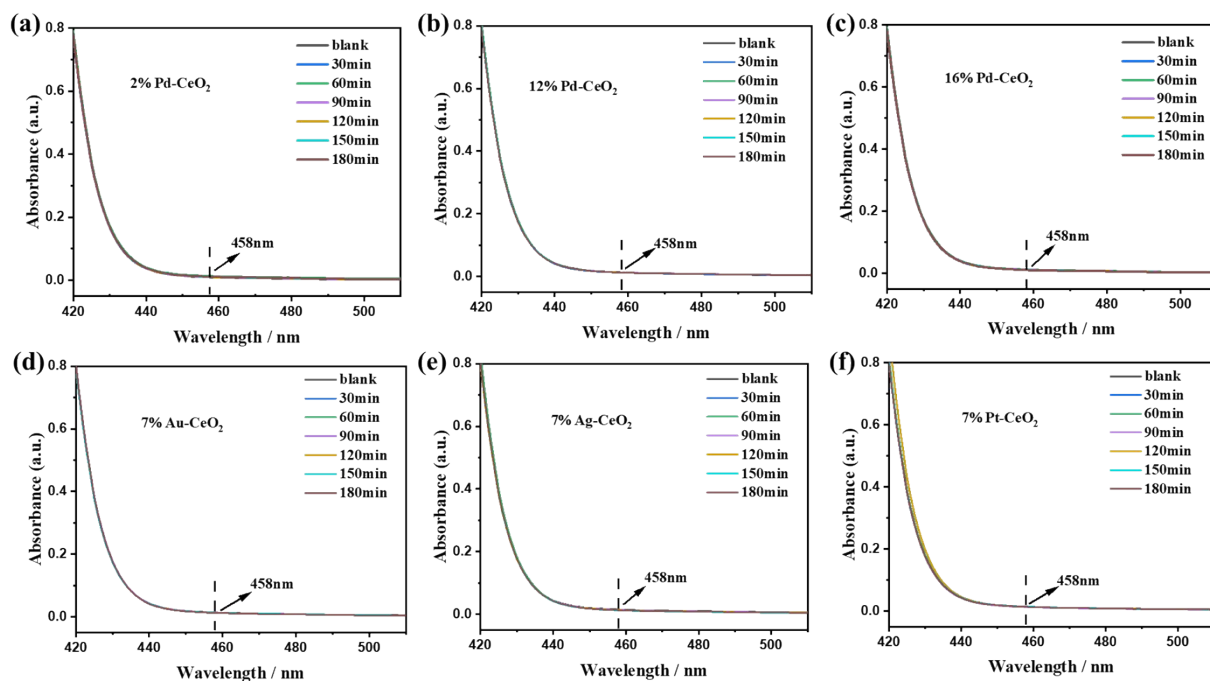

Fig. S12 The absorbance of a series of samples at 458 nm in different time periods was measured by UV-vis spectrophotometer. (a) 2% Pd- $\text{CeO}_2$ , (b) 12% Pd- $\text{CeO}_2$ , (c) 16% Pd- $\text{CeO}_2$ , (d) 7% Au- $\text{CeO}_2$ , (e) 7% Ag- $\text{CeO}_2$ , (f) 7% Pt- $\text{CeO}_2$ .

The experimental results indicated that barely any  $\text{N}_2\text{H}_4$  was generated during the photocatalytic urea synthesis.

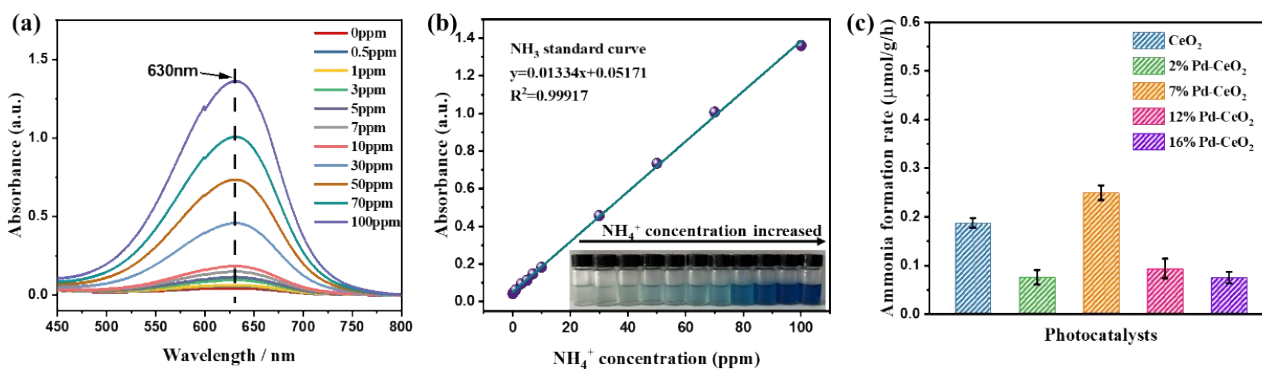

Fig. S13 The quantification of ammonia concentration by the indophenols blue method. (a) A series of standard solutions with ammonia concentrations of 0 ppm, 0.5 ppm, 1 ppm, 3 ppm, 5 ppm, 7 ppm, 10 ppm, 30 ppm, 50 ppm, 70 ppm and 100 ppm respectively and the absorbance at 630 nm was measured by UV-vis spectrophotometer. (b) The calibration curve for quantification of ammonia has good linear relation of absorbance with ammonia concentration ( $y = 0.01334x + 0.05171$ ,  $R^2 = 0.99917$ ). (c) The ammonia formation rates of  $\text{CeO}_2$ , 2% Pd- $\text{CeO}_2$ , 7% Pd- $\text{CeO}_2$ , 12% Pd- $\text{CeO}_2$  and 16% Pd- $\text{CeO}_2$ .

The by-product ammonia was detected by indophenol blue method. The results showed that only a small amount of ammonia was produced in the photocatalytic reaction.

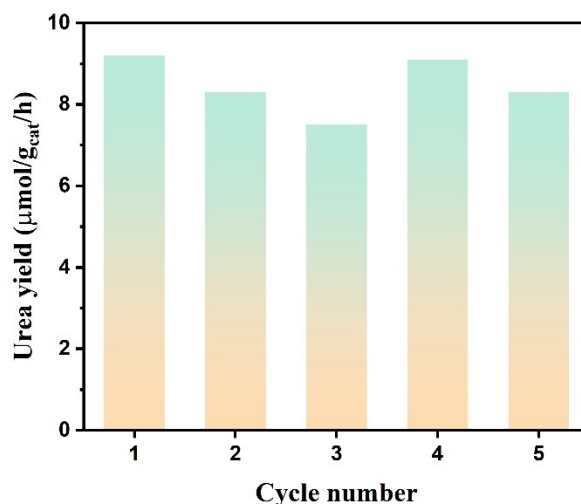

Fig. S14 Photocatalytic cycling tests for 7% Pd- $\text{CeO}_2$  with  $\text{CO}_2 + \text{N}_2$  as feeding gases.

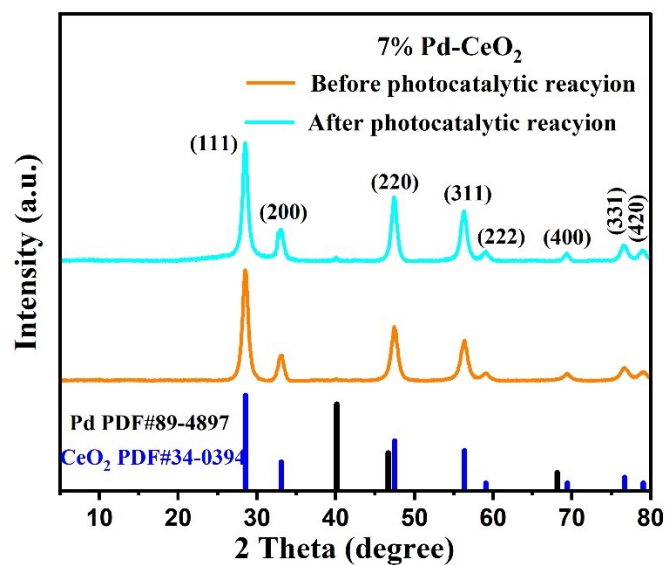

Fig. S15 XRD pattern of 7% Pd-CeO<sub>2</sub> before and after cycle experiments of photocatalytic reaction.

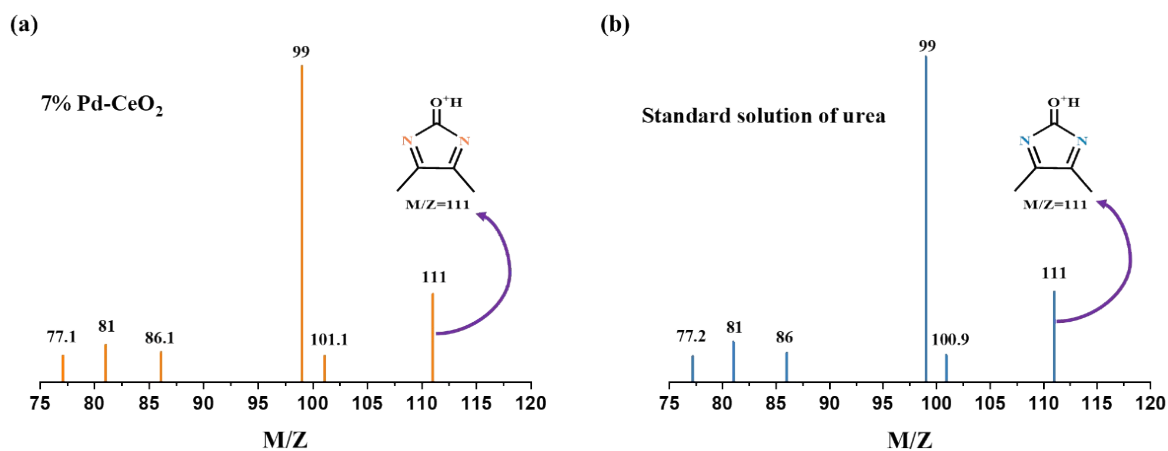

Fig. S16 (a) The mass spectrum of 7% Pd-CeO<sub>2</sub>. (b) The mass spectrum of urea standard solution with 10 ppm.

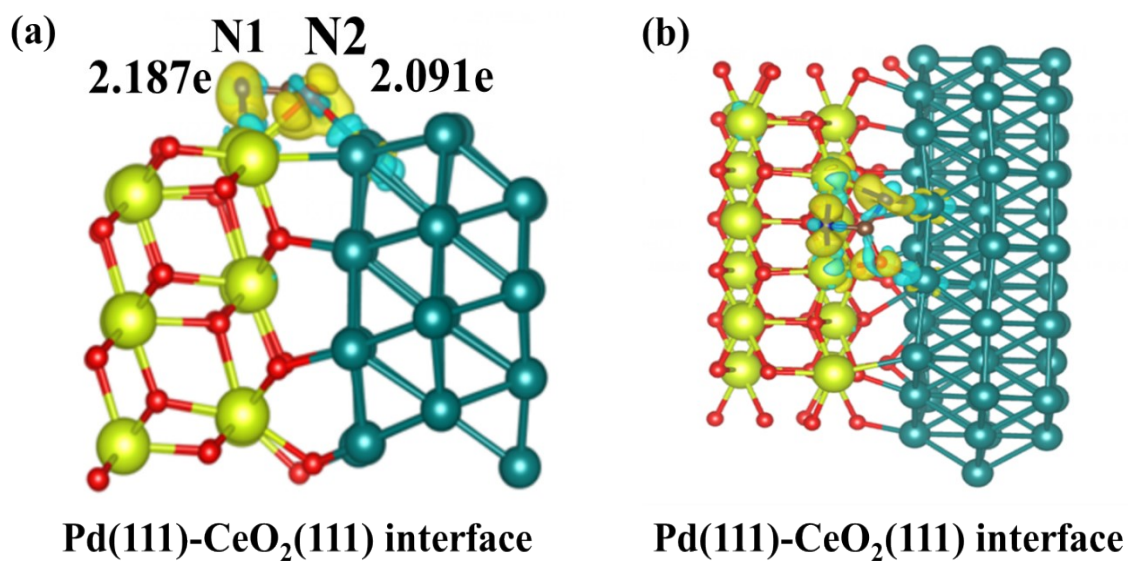

Fig. S17 The differential charge density of \*NCON at Pd (111)-CeO<sub>2</sub> (111) interface. (a) Side view, (b) Top view. (The blue color represents electron consumption and the yellow color represents electron accumulation).

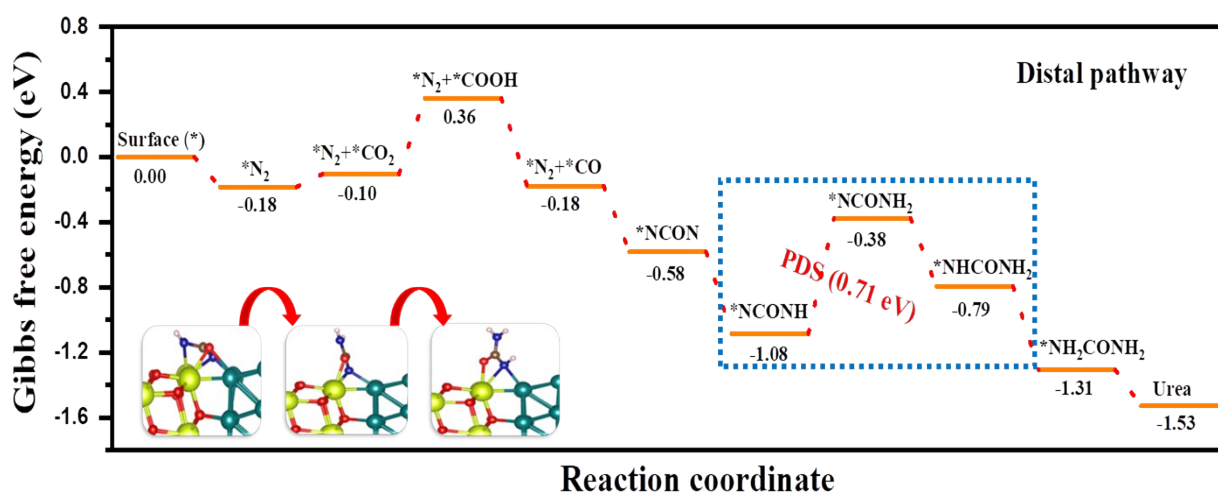

Fig. S18 The free energy diagram of urea production via distal pathway. The insets are the reaction processes of \*NHCONH<sub>2</sub> key intermediate. The yellow, red, pink, blue and green balls represent Ce, O, H, N and Pd atoms, respectively.

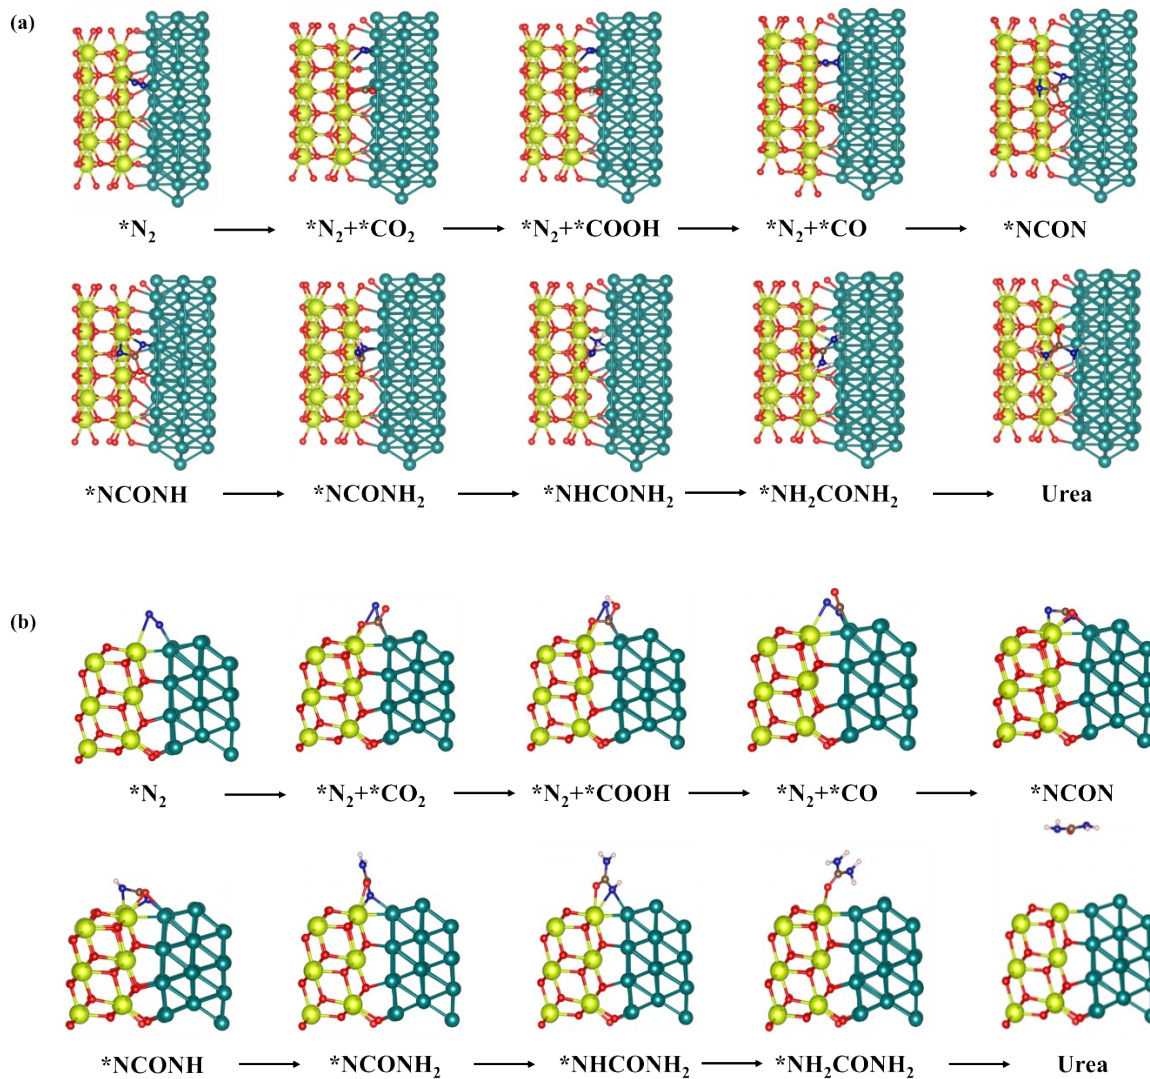

Fig. S19 The structural diagram of urea production process through distal pathway. (a) Top view. (b) Side view. The meanings of the colored balls: Ce (yellow), O (red), H (pink), N (blue) and Pd (green).

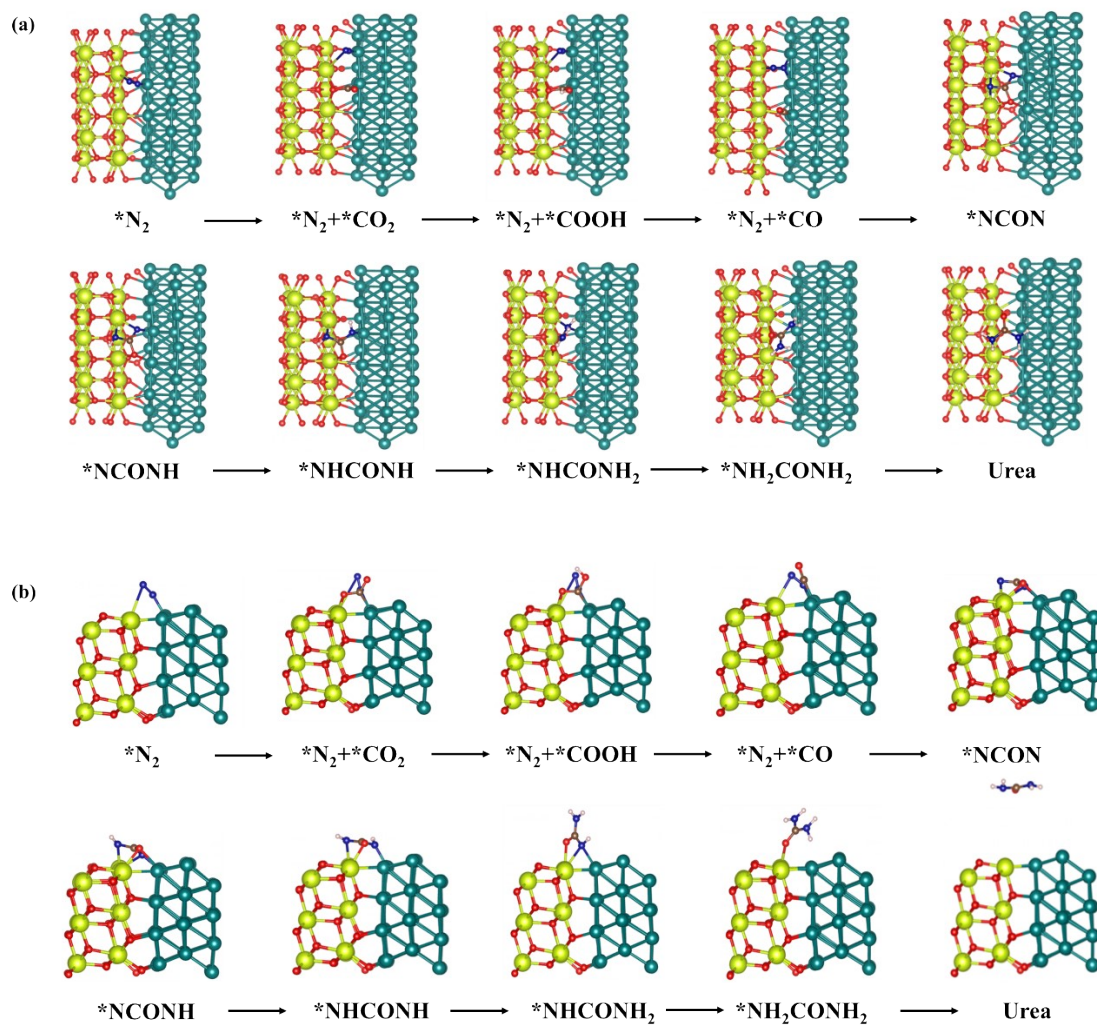

Fig. S20 The structural diagram of urea production process through alternating pathway. (a) Top view. (b) Side view. The meanings of the colored balls: Ce (yellow), O (red), H (pink), N (blue) and Pd (green).

Table S1 The loading content of metals in the m-CeO<sub>2</sub> NRs samples.

| Sample                      | 2% Pd-CeO <sub>2</sub> | 7% Pd-CeO <sub>2</sub> | 12% Pd-CeO <sub>2</sub> | 16% Pd-CeO <sub>2</sub> | 7% Au-CeO <sub>2</sub> | 7% Ag-CeO <sub>2</sub> | 7% Pt-CeO <sub>2</sub> |
|-----------------------------|------------------------|------------------------|-------------------------|-------------------------|------------------------|------------------------|------------------------|
| <b>Metal content (wt.%)</b> | 2.2                    | 6.6                    | 11.7                    | 15.6                    | 6.7                    | 6.8                    | 6.7                    |

Table S2 Specific surface area and pore size of the samples.

| Samples                | BET surface area (m <sup>2</sup> /g) | Pore size (nm) | Pore volume (cm <sup>3</sup> /g) |
|------------------------|--------------------------------------|----------------|----------------------------------|
| CeO <sub>2</sub>       | 109.52                               | 8.36           | 0.20                             |
| 2%Pd-CeO <sub>2</sub>  | 68.06                                | 11.91          | 0.18                             |
| 7%Pd-CeO <sub>2</sub>  | 75.57                                | 10.59          | 0.17                             |
| 12%Pd-CeO <sub>2</sub> | 62.24                                | 12.57          | 0.15                             |
| 16%Pd-CeO <sub>2</sub> | 58.16                                | 12.19          | 0.14                             |

Table S3 The binding energy of Pd 3d from XPS spectrum over 2% Pd-CeO<sub>2</sub>, 7% Pd-CeO<sub>2</sub>, 12% Pd-CeO<sub>2</sub> and 16% Pd-CeO<sub>2</sub>.

| Samples                | Pd 3d                             |                                    |                                   |                                    |
|------------------------|-----------------------------------|------------------------------------|-----------------------------------|------------------------------------|
|                        | Pd <sup>0</sup> 3d <sub>5/2</sub> | Pd <sup>2+</sup> 3d <sub>5/2</sub> | Pd <sup>0</sup> 3d <sub>3/2</sub> | Pd <sup>2+</sup> 3d <sub>3/2</sub> |
| 2%Pd-CeO <sub>2</sub>  | 335.2                             | 337.1                              | 340.3                             | 342.3                              |
| 7%Pd-CeO <sub>2</sub>  | 335.4                             | 337.1                              | 340.6                             | 342.4                              |
| 12%Pd-CeO <sub>2</sub> | 335.4                             | 337.1                              | 340.5                             | 342.3                              |
| 16%Pd-CeO <sub>2</sub> | 335.1                             | 336.8                              | 340.3                             | 342.1                              |



Table S4 The binding energy of Ce 3d from XPS spectrum over CeO<sub>2</sub>, 2% Pd-CeO<sub>2</sub>, 7% Pd-CeO<sub>2</sub>, 12% Pd-CeO<sub>2</sub> and 16% Pd-CeO<sub>2</sub>.

| Samples                | Binding Energy (eV)       |       |       |       |                           |       |       |       |
|------------------------|---------------------------|-------|-------|-------|---------------------------|-------|-------|-------|
|                        | Ce 3d <sub>5/2</sub> (eV) |       |       |       | Ce 3d <sub>3/2</sub> (eV) |       |       |       |
|                        | V                         | V'    | V''   | V'''  | U                         | U'    | U''   | U'''  |
| CeO <sub>2</sub>       | 882.1                     | 885.2 | 888.6 | 898.1 | 900.7                     | 903.0 | 907.1 | 916.5 |
| 2%Pd-CeO <sub>2</sub>  | 882.2                     | 885.0 | 888.6 | 898.3 | 900.8                     | 903.2 | 907.2 | 916.6 |
| 7%Pd-CeO <sub>2</sub>  | 882.3                     | 884.9 | 888.4 | 898.4 | 900.9                     | 903.5 | 907.3 | 916.7 |
| 12%Pd-CeO <sub>2</sub> | 882.3                     | 885.0 | 888.7 | 898.3 | 900.8                     | 903.5 | 907.2 | 916.7 |
| 16%Pd-CeO <sub>2</sub> | 882.0                     | 884.7 | 888.5 | 898.2 | 900.6                     | 903.0 | 907.2 | 916.5 |

Table S5 The binding energy of O 1s from XPS spectrum over CeO<sub>2</sub>, 2% Pd-CeO<sub>2</sub>, 7% Pd-CeO<sub>2</sub>, 12% Pd-CeO<sub>2</sub> and 16% Pd-CeO<sub>2</sub>.

| Samples                | Binding Energy (eV) |                  |                 |
|------------------------|---------------------|------------------|-----------------|
|                        | O 1s                |                  |                 |
|                        | O <sub>latt</sub>   | O <sub>ads</sub> | OH <sup>-</sup> |
| CeO <sub>2</sub>       | 529.2               | 531.2            | 533.0           |
| 2%Pd-CeO <sub>2</sub>  | 529.3               | 531.3            | 533.1           |
| 7%Pd-CeO <sub>2</sub>  | 529.4               | 531.3            | 533.6           |
| 12%Pd-CeO <sub>2</sub> | 529.4               | 531.3            | 533.8           |
| 16%Pd-CeO <sub>2</sub> | 529.3               | 531.2            | 533.1           |

---

## References

1. R. Si and M. Flytzani-Stephanopoulos, 2008, **47**, 2884-2887.
2. K. Ma, W. Liao, W. Shi, F. Xu, Y. Zhou, C. Tang, J. Lu, W. Shen and Z. Zhang, *Journal of Catalysis*, 2022, **407**, 104-114.
3. J. Zhao, X. Liu, X. Ren, X. Sun, D. Tian, Q. Wei and D. Wu, *Applied Catalysis B: Environmental*, 2021, **284**, 119746.
4. W. Zhang, D. Han, M. Dai, Y. Fan, G. Pan, W. Liang, Q. Zheng, D. Qin, D. Han, Y. He and L. Niu, *ACS Sustainable Chemistry & Engineering*, 2021, **9**, 15331-15343.
